# Supplementary material
Source: PubMed Central journal article supplement (PMC2676441)
Supplement: NIHMS49038-supplement-03.pdf [file NIHMS49038-supplement-03.pdf]

# Elevated Aflatoxin Exposure and Increased Risk of Hepatocellular Carcinoma

CHIEN-JEN CHEN,<sup>1</sup> LI-YU WANG,<sup>1</sup> SHENG-NAN LU,<sup>2</sup> MEI-HUEI WU,<sup>1</sup> SAN-LIN YOU,<sup>1</sup> YU-JING ZHANG,<sup>3</sup> LIAN-WEN WANG,<sup>3</sup>  
AND REGINA M. SANTELLA<sup>3</sup>

**To elucidate the importance of aflatoxin in the etiology of hepatocellular carcinoma (HCC), a community-based cohort study combined with molecular dosimetry of aflatoxin exposure was performed in the Penghu Islets where the HCC mortality rate is highest in Taiwan. A total of 6,487 residents aged 30 to 65 years were recruited in the two-stage screening survey and underwent regular follow-up examination. Among 33 newly-diagnosed HCC cases, 31 (94%) were chronic hepatitis B surface antigen (HBsAg) carriers and 3 (9%) were positive for antibodies against hepatitis C virus (HCV). Among 20 HCC patients and 86 matched healthy controls whose serum samples were tested for aflatoxin B<sub>1</sub> (AFB<sub>1</sub>)-albumin adducts by competitive enzyme-linked immunosorbent assay (ELISA), 13 (65%) HCC patients and 32 (37%) matched controls were seropositive, showing a statistically significant multivariate-adjusted odds ratio of 5.5 with a 95% confidence interval of 1.2 to 24.5. The results imply the elevated risk of HCC among Penghu residents may be attributable to their heavy exposure to aflatoxins and high HBsAg carrier rate. (HEPATOLOGY 1996;24:38-42.)**

Both viral and chemical carcinogens are involved in the multistage process of human hepatocarcinogenesis. Hepatocellular carcinoma (HCC), one of the major malignant neoplasms in the world,<sup>1-3</sup> is the leading cause of cancer-related death among men and the third among women in Taiwan, where hepatitis B virus (HBV) infection is hyperendemic.<sup>4,6</sup> The HBV surface antigen (HBsAg) carrier status has been well documented as one of the most important risk factors for HCC in Taiwan as in other countries.<sup>7,8</sup> In addition to chronic HBV infection, several other factors, including hepatitis C virus (HCV) infection, habitual alcohol intake, cigarette smoking, family history of HCC, low vegetable consumption, elevated serum testosterone level, and low serum retinol level, have been reported as HCC risk factors in Taiwan.<sup>9-14</sup>

Aflatoxin is a well-documented hepatocarcinogen in ani-

mals. A significant association between aflatoxin exposures and human HCC has been reported in several ecological<sup>15-21</sup> and molecular epidemiological studies.<sup>22-24</sup> However, the importance of aflatoxin in the development of HCC in Taiwan remains to be elucidated. A quantitative indirect immunofluorescence method has been developed<sup>25</sup> and used to detect aflatoxin B<sub>1</sub> (AFB<sub>1</sub>)-DNA adducts in surgically removed or needle-biopsy liver tissues of HCC patients in Taiwan. A detectable level of AFB<sub>1</sub>-DNA adducts was observed in frozen sections of tumor tissues from 8 of 27 (30%) HCC patients in northern Taiwan<sup>26</sup> and in smeared tumor tissues from 35 of 50 (70%) HCC patients in southern Taiwan.<sup>27</sup> Furthermore, there was no difference in positivity of AFB<sub>1</sub>-DNA adducts between tumor and nontumor tissues of HCC patients.<sup>26</sup> AFB<sub>1</sub>-DNA adducts in tumor tissues of HCC patients may be used as a biomarker for the exposure to aflatoxin.

The age-adjusted mortality rate of patients with liver cancer in the Penghu Islets has been reported to be the highest in Taiwan.<sup>4-6</sup> Recent surveys have shown that more than one third of peanuts in Penghu were heavily contaminated by aflatoxins, with an average aflatoxin content of 167  $\mu\text{g}/\text{kg}$  for contaminated peanuts.<sup>28</sup> This study was performed to assess the aflatoxin exposure for residents in Penghu by molecular dosimetry of the serum level of AFB<sub>1</sub>-albumin adducts of HCC patients and matched healthy controls.

## PATIENTS AND METHODS

**Study Area.** The Penghu Islets are located to the west of main Taiwan Island. There are six administrative areas including Makung, Hushi, Paisha, Hsiyu, Chimei, and Wanan. Makung, Hushi, and Paisha were chosen as the study area. There are about 100,000 residents who live in an area of 127 km<sup>2</sup>. Most men in the Penghu Islets are fishermen, salesmen, and farmers, and most women are housewives. Peanuts are major agricultural products in the Penghu Islets.

**Subject Recruitment.** Seemingly healthy residents recruited in a community-based two-stage screening program were chosen as the population of this study. They were selected from an eligible roster of residents obtained from household registration offices in which sociodemographic characteristics including birth, death, marriage, divorce, migration, education, and employment of each resident are registered and annually double-checked by mandate. Both men and women aged between 30 and 65 years were recruited for the screening program. All study subjects participated in this free screening program on a voluntary basis with an informed consent.

**Questionnaire Interview and Biospecimen Collection.** Participants were personally interviewed based on a structured questionnaire at recruitment. Information obtained included sociodemographic characteristics, cigarette smoking, alcohol drinking, betel nut chewing, consumption frequency of various food items, and personal and family history of major diseases. Questionnaire interviews were performed by public health nurses who were well trained to standardize their interview techniques. Blood samples were collected from each study subject. Aliquots of serum, buffy coat, plasma, and red blood cells separated from blood samples were all stored at  $-70^{\circ}\text{C}$ , and urine samples were stored at  $-30^{\circ}\text{C}$ . They were transported in dry ice to the central laboratory in the National Taiwan University College of Public Health where all biospecimens were kept in deep freezers until examination.

Abbreviations: HCC, hepatocellular carcinoma; HBV, hepatitis B virus; HBsAg, hepatitis B surface antigen; HCV, hepatitis C virus; AFB<sub>1</sub>, aflatoxin B<sub>1</sub>; ALT, alanine transaminase; AST, aspartate transaminase; AFP,  $\alpha$ -fetoprotein; anti-HCV, antibodies to HCV; ELISA, enzyme-linked immunosorbent assay.

From the <sup>1</sup>Institute of Epidemiology, National Taiwan University College of Public Health, Taipei, Taiwan; <sup>2</sup>Department of Internal Medicine, Kaohsiung Medical College, Kaohsiung, Taiwan; and <sup>3</sup>Division of Environmental Science, School of Public Health, Columbia University, New York, NY.

Received August 4, 1995; accepted February 2, 1996.

Supported by a grant from the Department of Health, Executive Yuan, Republic of China; National Institutes of Health grants ES05116 and CA21111; and a gift from the Lucille P. Markey Charitable Trust.

Address reprint requests to: Chien-Jen Chen, Sc.D., M. P.H., Institute of Epidemiology, College of Public Health, National Taiwan University, 1 Jen-Ai Road Section 1, Taipei 10018, Taiwan.

Copyright © 1996 by the American Association for the Study of Liver Diseases.  
0270-9139/96/2401-0007\$3.00/0

**Two-Stage HCC Screening.** In the two-stage screening program, study subjects were first screened by serological markers, including alanine transaminase (ALT), aspartate transaminase (AST),  $\alpha$ -fetoprotein (AFP), antibodies to HCV (anti-HCV), and HBsAg. Both ALT and AST levels were determined by serum chemistry autoanalyzer (Hitachi Model 736; Hitachi Co., Tokyo, Japan) using commercial reagents (Biomérieux, Mercy l'Étoile, France), whereas AFP, anti-HCV, and HBsAg were tested by enzyme immunoassay using commercial kits (Abbott Laboratories, North Chicago, IL). Any subject who had an elevated level of ALT ( $\geq 45$  IU/mL), AST ( $\geq 40$  IU/mL), or AFP ( $\geq 20$  ng/mL), a positive status of anti-HCV or HBsAg or a family history of HCC or liver cirrhosis among parents and siblings was referred for the second-stage screening by upper abdominal ultrasonography. The abdominal ultrasonography was performed by board-certified gastroenterologists who were well experienced in ultrasonographic examinations using a Toshiba SAL-38B ultrasonographic apparatus with 3.75 MHz real-time linear and sector probes (Toshiba, Japan). According to a standard procedure, both probes were used in the upper abdominal ultrasonography, which was also video recorded. The video records were used as the reference for the follow-up of focal lesions, such as HCC, hemangioma, fat-free area or pseudotumor formation in fatty liver, and liver cyst. They were also used for the peer reviews of parenchymal changes including fatty liver, cirrhosis, and chronic liver diseases.

**Confirmatory Diagnosis.** Any subjects who had an ultrasonographic image compatible with HCC were referred to one of several general teaching medical centers in Taiwan for further confirmations depending on the choice of the suspected cases. HCC was confirmed by computed tomography, digital subtracted angiogram, and aspiration cytology. Cytological examinations were independently performed by the teaching medical centers and Taipei Institute of Pathology. There were two criteria to diagnose HCC: (1) positive findings on cytological or pathological examinations or (2) typical images compatible with HCC with an AFP level  $\geq 400$  ng/mL. Confirmed HCC cases were further treated by surgical resection or transcatheter arterial chemo-embolization. Pathological examinations were also performed for surgically treated HCC patients.

**Follow-up Study.** Patients who were found to be affected with liver cirrhosis by ultrasonography were intensively followed up every 3 months, whereas others were regularly examined annually. The intensive follow-up of cirrhotic patients was performed by the examinations of serum AFP level and upper abdominal ultrasonography. The annual regular follow-up for noncirrhotic subjects was performed using the afore-mentioned two-stage screening protocol. Any suspected HCC cases thus identified were referred for confirmatory diagnosis as described before.

**Control Selection.** To examine the association between serum AFB<sub>1</sub>-albumin adducts level and HCC risk, controls were selected from cohort subjects who were not affected with HCC through the follow-up period. Controls were matched with cases on age ( $\pm 5$  years), sex, residential villages, and date of blood collection (within 3 months).

**AFB<sub>1</sub>-Albumin Adducts in Serum.** An enzyme-linked immunosorbent assay (ELISA) was used to determine the level of AFB<sub>1</sub>-albumin adducts in serum samples. To prepare an antiserum for the detection of AFB<sub>1</sub>-albumin adducts, human serum albumin (HSA), and bovine gamma globulin (BGG) were modified with AFB<sub>1</sub> epoxide synthesized by the method of Baertschi et al.<sup>29</sup> The modification levels ranged from 0.6 to 2.3 mol AFB<sub>1</sub>/mol protein. New Zealand white rabbits were immunized by intramuscular injection at four sites with 1 mg of the modified BGG (2.3 mol/mol) in complete Freund's adjuvant, followed by monthly boosting with 1 mg protein in incomplete adjuvant. Antiserum (#7) was characterized by competitive ELISA. For the standard curve in the ELISA, [<sup>3</sup>H] AFB<sub>1</sub>-HSA was digested with proteinase K as described later for the human samples and adducts isolated by Seppak C18 (Waters, Milford, MA) extraction using cartridges that were prewashed with 10 mL chloroform, 10 mL methanol and 10 mL water. After application of the sample in phosphate-buffered saline and washing with 10 mL water and 5 mL 5% methanol, the adducts were isolated with 5 mL 80% methanol. Adducts levels were determined from the specific activity.

Albumin was prepared from plasma essentially as described previously<sup>30</sup> and concentration determined with bicinchoninic acid (BCA Reagent, Pierce, Rockford, IL). For the digestion, 2 mg albumin and 0.5 mg proteinase K were incubated for 15 hours at 37°C. Adducts were isolated by the procedure described by Sheabar et al.,<sup>31</sup> dissolved in 0.5 mL phosphate-buffered saline containing 1% fetal calf

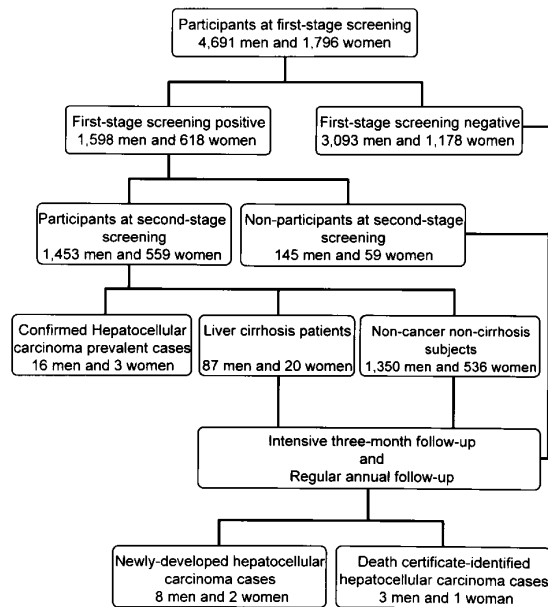

FIG. 1. Flow chart of two-stage HCC screening survey and follow-up examination.

serum and 1 mmol/L phenylmethylsulfonyl fluoride to inhibit residual protease activity, and assayed by competitive ELISA. This assay had 50% inhibition of antiserum binding at 10 to 20 fmol AFB<sub>1</sub> adduct per well. The limit of sensitivity (20% inhibition), when assaying the equivalent of 200  $\mu$ g albumin/well, was 0.01 fmol/ $\mu$ g. Samples were assayed by duplicate analysis in duplicate wells; samples with less than 20% inhibition were considered nondetectable. Two control samples were analyzed with each batch of sera, a pooled sample of plasma from nonsmoking American subjects and a positive control of serum from a rat treated with 1.5 mg AFB<sub>1</sub>.

**Data Analysis and Statistical Methods.** In the data analysis for the association between HCC risk and serum AFB<sub>1</sub>-albumin adducts level, the serum level was categorized into two groups, detectable and nondetectable, using the detection limit of 0.01 fmol/ $\mu$ g as the cut-off value. Multiple logistic regression analysis was used to calculate odds ratios and their 95% confidence intervals for HCC risk factors including serum AFB<sub>1</sub>-albumin adducts level after adjustment for age and sex. The HBsAg carrier status, anti-HCV seropositivity, and family history of liver cancer and cirrhosis among parents and siblings were further included in the multiple logistic regression to derive multivariate-adjusted odds ratio with its 95% confidence interval for serum level of AFB<sub>1</sub>-albumin adducts.

## RESULTS

As shown in Fig. 1, 4,691 male and 1,796 female residents in the Penghu Islets were recruited for the first-stage screening survey from March 1, 1991 through June 30, 1992. There were 1,019 (22%) men and 294 (16%) women who were HBsAg-positive, 190 (4%) men and 231 (13%) women were anti-HCV-positive, 337 (7%) men and 128 (7%) women had an ALT level  $\geq 45$  IU/mL, 306 (7%) men and 149 (8%) women had an AST level  $\geq 40$  IU/mL, 56 (1%) men and 16 (1%) women had an AFP level  $\geq 20$  ng/mL, 313 (7%) men and 107 (6%) women had a family history of HCC and liver cirrhosis. In total there were 1,598 (34%) men and 618 (34%) women with positive results for at least one of the six first-stage criteria. They were referred for the second-stage screening by abdominal ultrasonography, and 1,453 men and 559 women participated the ultrasonographic examinations, a response rate of 91% and 90%, respectively. Those who had ultrasonographic findings compatible with HCC were referred to teaching medical centers in main Taiwan Island for further confirmation examinations, and 16 male and 3 female subclinical HCC patients were thus diagnosed. In the intensive 3-month

TABLE 1. Characteristics of 33 Newly Diagnosed Subclinical HCC Cases in the Penghu Islets

| Case No. | Sex | Age | HBsAg | Anti-HCV | AFP (ng/mL) | AST (IU/L) | ALT (IU/L) | Family History | Tumor Type | Largest Tumor Size (cm) | Portal Vein Tumor Thrombi |
|----------|-----|-----|-------|----------|-------------|------------|------------|----------------|------------|-------------------------|---------------------------|
| 1810436  | M   | 48  | +     | -        | 11.2        | 45         | 62         | Yes            | M          | 2.0                     | No                        |
| 1810542  | M   | 59  | +     | -        | 194.3       | 26         | 29         | No             | M          | 1.7                     | No                        |
| 1810887  | M   | 49  | -     | -        | 15.6        | 15         | 4          | No             | M          | >10.0                   | Yes                       |
| 1811537  | M   | 58  | +     | -        | >1,000      | 78         | 26         | No             | MS         | 10.0                    | Yes                       |
| 1812628  | M   | 62  | +     | -        | 307.0       | 23         | 15         | No             | M          | >10.0                   | Yes                       |
| 1813874  | M   | 62  | +     | -        | 215.4       | 108        | 58         | No             | M          | 2.0                     | No                        |
| 1814712  | M   | 35  | +     | -        | 14.5        | 32         | 30         | No             | S          | 5.0                     | No                        |
| 1821777  | F   | 64  | +     | -        | 115.8       | 30         | 18         | No             | M          | 5.0                     | Yes                       |
| 1823810  | F   | 65  | +     | -        | 19.0        | 34         | 15         | No             | S          | 6.0                     | No                        |
| 1824510  | F   | 56  | +     | -        | 4.6         | 42         | 33         | No             | M          | 2.4                     | No                        |
| 4810265  | M   | 36  | +     | -        | 1.3         | 25         | 47         | No             | M          | 6.0                     | No                        |
| 4814026  | M   | 59  | +     | -        | 24.2        | 36         | 33         | Yes            | M          | 3.0                     | No                        |
| 4814101  | M   | 59  | +     | -        | 1.8         | 24         | 21         | No             | S          | 4.8                     | No                        |
| 4814239  | M   | 55  | +     | -        | 1.1         | 26         | 28         | No             | MS         | 2.0                     | No                        |
| 4814294  | M   | 57  | +     | +        | >1,000      | 22         | 17         | No             | S          | 3.1                     | No                        |
| 4814944  | M   | 53  | +     | -        | 2.1         | 50         | 36         | No             | MS         | 4.0                     | No                        |
| 4815106  | M   | 54  | +     | -        | 14.0        | 25         | 17         | No             | M          | 2.0                     | No                        |
| 4815168  | M   | 54  | +     | -        | 10.4        | 93         | 32         | No             | MS         | 2.3                     | No                        |
| 4818066  | M   | 50  | +     | -        | >1,000      | 24         | 28         | No             | S          | 3.0                     | No                        |
| 4910405  | M   | 38  | +     | -        | >1,000      | 24         | 25         | Yes            | MS         | 6.0                     | Yes                       |
| 4913556  | M   | 53  | +     | -        | 6.2         | 22         | 35         | No             | M          | 2.5                     | No                        |
| 4914011  | M   | 63  | +     | -        | >1,000      | 28         | 32         | Yes            | M          | 6.0                     | No                        |
| 5810014  | M   | 46  | +     | -        | 8.3         | 16         | 19         | No             | M          | 5.5                     | No                        |
| 5810737  | M   | 43  | +     | -        | >1,000      | 20         | 15         | Yes            | MS         | 8.0                     | No                        |
| 5810816  | M   | 60  | +     | -        | 3.4         | 45         | 32         | No             | S          | 4.8                     | No                        |
| 5811691  | M   | 50  | +     | +        | 4.9         | 37         | 39         | No             | S          | 2.0                     | No                        |
| 5812491  | M   | 52  | +     | -        | 6.0         | 60         | 64         | No             | S          | 5.0                     | No                        |
| 5812658  | M   | 52  | -     | -        | 28.5        | 24         | 44         | No             | D          | 6.0                     | Yes                       |
| 5812733  | M   | 60  | +     | -        | 6.7         | 16         | 7          | No             | MS         | 4.1                     | No                        |
| 5813587  | M   | 53  | +     | -        | 4.4         | 42         | 44         | No             | M          | 3.0                     | No                        |
| 5820166  | F   | 56  | +     | -        | 0.8         | 47         | 35         | No             | S          | 3.3                     | No                        |
| 5821037  | F   | 56  | +     | +        | 5.4         | 36         | 23         | No             | S          | 2.0                     | No                        |
| 5823255  | F   | 57  | +     | -        | 184.3       | 60         | 47         | Yes            | NA         | NA                      | NA                        |

Abbreviations: M, multiple; MS, multiple and satellite; S, solitary; D, diffuse; NA, not available; +, positive; -, negative.

follow-up of 87 men and 20 women who were affected with cirrhosis, 10 newly-developed HCC cases were identified before December 31, 1993. Another 4 study subjects were identified from the regular annual follow-up combined with death certification data linkage during a period from July 1, 1992 through December 31, 1993.

Medical records of 33 HCC cases treated in medical centers were reviewed and abstracted according to a standard protocol. Clinical characteristics, including serological markers tested at the recruitment and angiographic findings of these 33 newly-identified HCC cases, are shown in Table 1. All but 2 of them (94%) were HBsAg-positive, 9% were anti-HCV-positive, 39% had an AFP level  $\geq 20$  ng/mL, 33% had an AST level  $\geq 40$  IU/L, 15% had an ALT level  $\geq 45$  IU/L, and 18% had a family history of HCC and cirrhosis among parents and siblings.

Serum levels of AFB<sub>1</sub>-albumin adducts in 20 HCC cases and 86 matched controls were determined by competitive ELISA. There were 13 (65%) HCC cases and 32 (37%) matched controls who had a detectable serum level of AFB<sub>1</sub>-albumin adducts. Table 2 shows the odds ratios with 95% confidence intervals for HBsAg carrier status, anti-HCV seropositivity, serum level of AFB<sub>1</sub>-albumin adducts, family history of liver cancer and cirrhosis among parents and siblings, cigarette smoking habit, and habitual alcohol drinking after adjustment for age and sex. There was a significant association with the development of HCC for HBsAg carrier status, serum level of AFB<sub>1</sub>-albumin adducts, family history of liver cancer and cirrhosis, cigarette smoking, and habitual alcohol drinking. The age-sex-adjusted odds ratio (95% confidence interval) of developing HCC was 3.2 (1.1-8.9) for the detectable serum level of AFB<sub>1</sub>-albumin adducts.

TABLE 2. Age-Sex-Adjusted Odds Ratios With 95% Confidence Intervals for Hepatitis Infection, Serum Level of AFB<sub>1</sub>-Albumin Adducts, Cigarette Smoking, and Habitual Alcohol Drinking in the Penghu Islets

| Risk Factor                                  | Healthy Controls (No. [%]) | HCC Cases (No. [%]) | Odds Ratio (95% confidence interval) |
|----------------------------------------------|----------------------------|---------------------|--------------------------------------|
| HBsAg carrier status                         |                            |                     |                                      |
| Negative                                     | 106 (86.2)                 | 2 (6.1)             | 1.0 (referent)                       |
| Positive                                     | 16 (13.0)                  | 31 (93.9)           | 112.1 (23.6-533.8)*                  |
| Missing                                      | 1 (0.8)                    | 0 (0.0)             |                                      |
| Anti-HCV seropositivity                      |                            |                     |                                      |
| Negative                                     | 108 (87.8)                 | 29 (87.9)           | 1.0 (referent)                       |
| Positive                                     | 12 (9.8)                   | 3 (9.1)             | 0.9 (0.2-3.6)                        |
| Missing                                      | 3 (2.4)                    | 1 (3.0)             |                                      |
| AFB <sub>1</sub> -albumin adducts            |                            |                     |                                      |
| Negative                                     | 54 (43.9)                  | 7 (21.2)            | 1.0 (referent)                       |
| Positive                                     | 32 (26.0)                  | 13 (39.4)           | 3.2 (1.1-8.9)*                       |
| Missing                                      | 37 (30.1)                  | 13 (39.4)           |                                      |
| Family history of liver cancer and cirrhosis |                            |                     |                                      |
| No                                           | 116 (94.3)                 | 27 (81.8)           | 1.0 (referent)                       |
| Yes                                          | 6 (4.9)                    | 6 (18.2)            | 4.3 (1.3-14.5)*                      |
| Missing                                      | 1 (0.8)                    | 0 (0.0)             |                                      |
| Cigarette smoking                            |                            |                     |                                      |
| Never                                        | 63 (51.2)                  | 10 (30.3)           | 1.0 (referent)                       |
| Ever                                         | 60 (48.8)                  | 23 (69.7)           | 3.6 (1.3-10.6)*                      |
| Alcohol drinking                             |                            |                     |                                      |
| Never                                        | 101 (82.1)                 | 23 (69.7)           | 1.0 (referent)                       |
| <20 L/yr                                     | 7 (5.7)                    | 2 (6.1)             | 1.2 (0.2-6.5)                        |
| $\geq 20$ L/yr                               | 3 (2.4)                    | 4 (12.1)            | 5.8 (1.2-28.1)*                      |
| Missing                                      | 12 (9.8)                   | 4 (12.1)            |                                      |

\*  $P < .05$ .

Table 3 shows multivariate-adjusted odds ratios and 95% confidence intervals for HBsAg carrier status, anti-HCV seropositivity, serum AFB<sub>1</sub>-albumin adducts level, and family history of liver cancer and cirrhosis. Only HBsAg carrier status and detectable serum level of AFB<sub>1</sub>-albumin adducts were significantly associated with an increased risk of HCC. The multivariate-adjusted odds ratio (95% confidence interval) of developing HCC was 5.5 (1.2-24.5) for the detectable serum level of AFB<sub>1</sub>-albumin adducts.

### DISCUSSION

Chinese throughout the world have a high incidence of HCC that may be attributable to both environmental and genetic risk factors.<sup>10</sup> HBV has been well documented as the most important environmental risk factor for HCC in Taiwan.<sup>4-11</sup> In this study, 94% newly-diagnosed subclinical HCC patients were HBsAg carriers. Chronic HBV infection may increase the probability of accumulating changes in multiple genes, including oncogenes and tumor suppressor genes through specific integration of the HBV genome in hepatocytes or through transactivation by HBV X antigen or truncated products of pre-S2/S genes.<sup>32-37</sup> Chronic HBV infection may also act as a promoter and/or progressor in hepatocarcinogenesis through chronic phasic necroinflammation resulting from the accumulation of HBsAg in hepatocytes.<sup>38</sup>

There are observations suggesting that other factors in addition to chronic HBV infection are important to the development of HCC in Taiwan as in other countries.<sup>3-14</sup> An ecological correlation study also showed a significant association between urinary aflatoxin level and age-adjusted HCC mortality rates at the township level in Taiwan.<sup>21</sup> Residents in the Penghu Islets were reported to have the highest mortality rate caused by liver cancer in Taiwan,<sup>4-6</sup> and peanuts in Penghu Islets were heavily contaminated by aflatoxins.<sup>28</sup> In this study, the HBsAg carrier rate was 22% for men and 16% for women in the Penghu Islets. Because the rates were only slightly higher than that of the general population in Taiwan, the increased HCC risk in Penghu Islets could not readily be explained by its HBsAg carrier rate. Some other environmental factors, especially aflatoxin exposure, may also play an important role in the development of HCC.

AFB<sub>1</sub> is the most potent hepatocarcinogen in a variety of animal species.<sup>39</sup> It is metabolized predominantly in hepatocytes by the microsomal mixed-function oxygenase enzyme system to various reduced and oxidized derivatives including an unstable reactive AFB<sub>1</sub>-8,9-epoxide, which can bind covalently to nucleophilic sites of biological macromolecules including nucleic acids and proteins.<sup>40</sup> The formation of AFB<sub>1</sub>-guanine adducts has been shown to be critical for the carcinogenesis induced by AFB<sub>1</sub> in animals.<sup>41</sup> AFB<sub>1</sub>-8,9-epoxide reacts with albumin in the liver to form AFB<sub>1</sub>-albumin adducts that are major protein adducts of AFB<sub>1</sub> found in peripheral blood. The use of aflatoxin-albumin adducts as a biomarker of exposure has several advantages: (1) aflatoxin-

albumin adducts reflect DNA damage in hepatocytes as does aflatoxin-N<sup>7</sup>-guanine in urine,<sup>42</sup> (2) albumin adducts, at least in experimental animals, are as long-lived as albumin, which has a half-life of 21 days and thus provide a cumulative measure of exposure over a long period of time,<sup>43</sup> and (3) multiple measurements of urinary aflatoxin are required to reflect average exposure, but only a single measurement of albumin adducts is needed to provide a representative average exposure.<sup>44</sup> All previous epidemiological studies on the association between aflatoxin and HCC were based on the urinary aflatoxin level.<sup>22,23</sup> This study, to the best of our knowledge, is the first one reporting a significant association between elevated serum AFB<sub>1</sub>-albumin level and HCC risk. The peanuts in Penghu were reported to be heavily contaminated with aflatoxin,<sup>28</sup> and peanuts are frequently consumed by residents in the Penghu Islets according to our questionnaire interview at recruitment. The aflatoxin contamination may vary in different seasons. As the seromarker used in this study may reflect a long-term exposure to aflatoxin, it is considered appropriate to control seasonal variation in aflatoxin exposure by matching date of biospecimen collection.

Study subjects participated in this screening program on a voluntary basis, and there may exist some self-selection bias that results in the biased estimation of prevalence and incidence. However, comparability is more important than representativeness in studies designed to assess the association between health outcome and risk factor exposure. Because both cases and controls were selected from the screens of this study, they were considered quite comparable in physical and psychological characteristics related to their choice to participate.

Setting the type I error (alpha) level of 0.05, type II error (beta) level of 0.20, exposure rate among controls of 0.40, detectable odds ratio of 5.0, and a case-control ratio of 4.0, the minimum sample size required for cases was 16.<sup>45</sup> Although the sample size was small in this study, the statistical power to detect a significant association between AFB<sub>1</sub>-albumin adduct level and HCC risk was as high as >0.80. Furthermore, the odds ratio of developing HCC remained statistically significant after adjustment for other risk factors, indicating the sample size was adequate. In a recent study including only 22 cases and 140 controls,<sup>22</sup> a statistically significant association between urinary aflatoxin level and HCC was observed after multivariate adjustment for HBsAg seropositivity, educational level, cigarette smoking, and alcohol drinking, showing an adjusted odds ratio of 3.8 ( $P < .05$ ). Short-term biomarkers of aflatoxin were used in the previous study, whereas a better long-term marker for biologically effective dose of aflatoxin exposure was used in our study. Despite a small number of HCC cases, a statistically significant multivariate-adjusted odds ratio as high as 5.5 was observed for the seropositivity of AFB<sub>1</sub>-albumin adducts in this study.

Study subjects who participated in this study were free from symptoms of liver diseases and did not change their dietary habit and life style at the time of biospecimen collection. Furthermore, a long-term rather than short-term biomarker was used to estimate aflatoxin exposure. It seems reasonable to assume the serum aflatoxin AFB<sub>1</sub>-albumin level determined at recruitment may reflect the usual exposure to aflatoxin among study subjects. The association between aflatoxin exposure and HCC risk was analyzed for prevalent and incident case-control sets, respectively. The odds ratios were found comparable but not statistically significant because of the small sample size. It is considered appropriate to combine incident and prevalent case-control sets because of their similarity in the magnitude of association between serum AFB<sub>1</sub>-albumin adducts level and HCC risk.

It has been documented that AFB<sub>1</sub> selectively targets at the third base position of codon 249 (G:C to T:A transversion) of the p53 gene.<sup>46</sup> The G-to-T transversion at codon 249 of p53

TABLE 3. Multiple Logistic Regression of Risk Factors for HCC and Matched Healthy Controls in the Penghu Islets

| Risk Factors                                 | Group         | Odds Ratio<br>(95% confidence interval) |
|----------------------------------------------|---------------|-----------------------------------------|
| HBsAg                                        | Negative      | 1.0 (referent)                          |
|                                              | Positive      | 129.4 (25.4-659.2)*                     |
| Anti-HCV                                     | Negative      | 1.0 (referent)                          |
|                                              | Positive      | 1.8 (0.2-13.3)                          |
| AFB <sub>1</sub> -albumin adducts            | Nondetectable | 1.0 (referent)                          |
|                                              | Detectable    | 5.5 (1.2-24.5)*                         |
| Family history of liver cancer and cirrhosis | No            | 1.0 (referent)                          |
|                                              | Yes           | 4.2 (0.6-31.3)                          |

\*  $P < .05$ .

has been documented as the mutational hotspot in human hepatocellular carcinoma.<sup>47,48</sup> As p53 is involved in the tumor suppression, it seems reasonable to conclude that AFB<sub>1</sub> plays an important role in the late stage of hepatocarcinogenesis, although an early stage effect may also exist. At least partly attributable to heavy exposure to aflatoxin, the onset age of HCC among residents in Penghu Islets was 10 years younger than that among those who lived in Taiwan Island. A synergistic effect on HCC has recently been observed between HBsAg carrier status and aflatoxin exposure.<sup>22,23</sup> The elevated HCC risk among residents in Penghu Islets seems attributable to their high HBsAg carrier rate and heavy aflatoxin exposure.

#### REFERENCES

- Falk H. Liver. In: Schottenfeld D, Fraumeni J Jr, eds. Cancer epidemiology and prevention. Philadelphia: Saunders, 1982:668-682.
- Bosch FX, Munoz N. Epidemiology of hepatocellular carcinoma. In: Banasch P, Keppler D, Weber G, eds. Liver cell carcinoma. Dordrecht: Kluwer Academic, 1989:3-12.
- Linsell A. Primary liver cancer: Epidemiology and etiology. In: Wanebo HJ, ed. Hepatic and biliary cancer. New York: Dekker, 1987:3-15.
- Lin TM, Tsu WT, Chen CJ. Mortality of hepatoma and cirrhosis of liver in Taiwan. Br J Cancer 1986;54:969-976.
- Chen CJ, Lee SS, Hsu KH, Tsai SF, You SL, Lin TM. Epidemiologic characteristics of malignant neoplasms in Taiwan: I. All cancer sites. J Natl Public Health Assoc (ROC) 1988;8:59-71.
- Yu MW, Tsai SF, Hsu KH, You SL, Lee SS, Lin TM, Chen CJ. Epidemiologic characteristics of malignant neoplasms in Taiwan: II. liver cancer. J Natl Public Health Assoc (ROC) 1988;8:125-138.
- Beasley RP. Hepatitis B virus as the etiologic agent in hepatocellular carcinoma: epidemiologic considerations. HEPATOLOGY 1982;2(suppl):21-26.
- Yu MW, Chen CJ. Hepatitis B and C viruses in the development of hepatocellular carcinoma. Crit Rev Oncol Hematol 1994;17:71-91.
- Yu MW, You SL, Chang AS, Lu SN, Liaw YF, Chen CJ. Association between hepatitis C virus antibodies and hepatocellular carcinoma in Taiwan. Cancer Res 1991;51:5621-5625.
- Chang CC, Yu MW, Lu CF, Yang CS, Chen CJ. A nested case-control study on association between hepatitis C virus antibodies and primary liver cancer in a cohort of 9,775 men in Taiwan. J Med Virol 1994;43:276-280.
- Chen CJ, Liang KY, Chang AS, Chang YC, Lu SN, Liaw YF, Chang WY, et al. Effects of hepatitis B virus, alcohol drinking, cigarette smoking, and familial tendency on hepatocellular carcinoma. HEPATOLOGY 1991;13:398-406.
- Chen CJ, Yu MW, Wang CJ, Huang HY, Lin WC. Multiple risk factors of hepatocellular carcinoma: a cohort study of 13,737 male adults in Taiwan. J Gastroenterol Hepatol 1993;8:s83-s87.
- Yu MW, Chen CJ. Elevated serum testosterone levels and risk of hepatocellular carcinoma. Cancer Res 1993;53:790-794.
- Yu MW, Hsieh HH, Pan WH, Yang CS, Chen CJ. Vegetable consumption, serum retinol level and risk of hepatocellular carcinoma. Cancer Res 1995;55:1301-1305.
- Shank RC, Gordon JE, Wogan GN, Nondasuta A, Subhamani B. Dietary aflatoxins and human liver cancer: III. Field survey of rural Thai families for ingested aflatoxins. Food Cosmet Toxicol 1972;10:71-84.
- Peers FG, Linsell CA. Dietary aflatoxins and liver cancer: a population based study in Kenya. Br J Cancer 1973;27:473-484.
- Peers FG, Gilman GA, Linsell CA. Dietary aflatoxins and human liver cancer: a study in Swaziland. Br J Cancer 1976;17:167-176.
- Peers F, Bosch X, Kaldor J, Linsell A, Pluijmen M. Aflatoxin exposure, hepatitis B virus infection and liver cancer in Swaziland. Int J Cancer 1987;39:545-553.
- Van Rosenberg SJ, Cook-Mozaffari P, Van Schalkwyk DJ, Van Der Watt JJ, Vincent TJ, Purchase IF. Hepatocellular carcinoma and dietary aflatoxin in Mozambique and Transkei. Br J Cancer 1985;51:713-726.
- Yeh FS, Yu MC, Mo CC, Luo S, Tong MJ, Henderson BE. Hepatitis B virus, aflatoxins, and hepatocellular carcinoma in southern Guangxi, China. Cancer Res 1989;49:2506-2509.
- Hatch MC, Chen CJ, Levin B, Ji BT, Yang GY, Hsu SW, Wang LW, et al. Urinary aflatoxin levels, hepatitis B virus infection and hepatocellular carcinoma in Taiwan. Int J Cancer 1993;54:931-934.
- Ross RK, Yuan JM, Yu MC, Wogan GN, Qian GS, Tu JT, Groopman JD, et al. Urinary aflatoxin biomarkers and risk of hepatocellular carcinoma. Lancet 1992;339:943-946.
- Qian GS, Ross RK, Yu MC, Yuan JM, Gao YT, Henderson BE, Wogan GN, et al. A follow-up study of urinary markers of aflatoxin exposure and liver cancer risk in Shanghai, People's Republic of China. Cancer Epidemiol Biomarker Prev 1994;3:3-10.
- Allen SJ, Wild CP, Riley EM, Montesano R, Bennett S, Whittle HC, Hall AJ, et al. Aflatoxin exposure, malaria and hepatitis B infection in rural Gambian children. Trans R Soc Trop Med Hyg 1992;58:426-430.
- Zhang YJ, Chen CJ, Haghghi B, Yang GY, Hsieh LL, Wang LW, Santella RM. Quantitation of aflatoxin B<sub>1</sub>-DNA adducts in woodchuck hepatocytes and rat liver tissue by indirect immunofluorescence analysis. Cancer Res 1991;51:1720-1725.
- Zhang YJ, Chen CJ, Lee CS, Haghghi B, Yang GY, Wang LW, Feitelson M, et al. Aflatoxin B<sub>1</sub>-DNA adducts and hepatitis B antigens in hepatocellular carcinoma and non-tumorous liver tissues. Carcinogenesis 1991;12:2249-2252.
- Chen CJ, Zhang YJ, Lu SN, Santella RM. Aflatoxin B<sub>1</sub> DNA adducts in smeared tumor tissues from patients with hepatocellular carcinoma. HEPATOLOGY 1992;16:1150-1155.
- Li KC, Li HP, Wong SS, Chuang YS. Survey of aflatoxin contaminations in peanuts from various areas in Taiwan. Taichung: Taiwan Agricultural Chemical and Toxic Substances Research Institute. 1977:37.
- Orti DL, Grainger J, Ashley DL, Hill RH Jr. Chromatographic and spectroscopic properties of hemiacetals of aflatoxin and sterigmatocystin metabolites. J Chromatography 1989;462:268-279.
- Baertschi SW, Raney KD, Stone MP, Harris TM. Preparation of the 8,9-epoxide of the mycotoxin aflatoxin B<sub>1</sub>: the ultimate carcinogenic species. J Am Chem Soc 1988;110:7929-7931.
- Wild CP, Jiang YZ, Sabbioni G, Chapot B, Montesano R. Evaluation of methods for quantitation of aflatoxin-albumin adducts and their application to human exposure assessment. Cancer Res 1990;50:245-251.
- Sheabar FZ, Groopman JD, Qian GS, Wogan GN. Quantitative analysis of aflatoxin-albumin adducts. Carcinogenesis 1993;14:1203-1208.
- Dejean A, Bougueleret L, Grzeschik KH, Tiollais P. Hepatitis B virus DNA integration in a sequence homologous to *v-erb-A* and steroid receptor genes in a hepatocellular carcinoma. Nature 1986;322:70-72.
- Benbrook D, Lernhardt E, Pfahl M. A new retinoic acid receptor identified from a hepatocellular carcinoma. Nature 1988;333:669-672.
- Hino O, Shows TB, Rogler CE. Hepatitis B virus integration site in hepatocellular carcinoma at chromosome 17;18 translocation. Proc Natl Acad Sci U S A 1986;83:8338-8342.
- Kekule AS, Lauer U, Meyer M, Caselmann WH, Hofschneider PH, Koshy R. The preS2/S region of integrated hepatitis B virus DNA encodes a transcriptional transactivator. Nature 1990;343:457-461.
- Spandau DF, Lee CH. Transactivation of viral enhancers by the hepatitis B virus X protein. J Virol 1988;62:427-434.
- Kim CM, Koike K, Saito I, Miyamura T, Jay G. HBx gene of hepatitis B virus induces liver cancer in transgenic mice. Nature 1991;351:317-320.
- Dragan YP, Pitot HC. Aflatoxin carcinogenesis in the context of the multistage nature of cancer. In: Eaton DL, Groopman JD, eds. The toxicology of aflatoxins: human health, veterinary, and agricultural significance. San Diego: Academic, 1994:233-258.
- Gallagher EP, Wienkers LC, Stapleton PL, Kunze KL, Eaton DL. Role of human microsomal and human complementary DNA-expressed cytochromes P4501A2 and P4503A4 in the bioactivation of aflatoxin B<sub>1</sub>. Cancer Res 1994;54:101-108.
- Kensler TW, Egner PA, Davidson BD, Roebuck BD, Pikul A, Groopman JD. Modulation of aflatoxin metabolism, aflatoxin-N<sup>7</sup>-guanine formation, and hepatic tumorigenesis in rats fed ethoxyquin: role of reduction of glutathione S-transferase. Cancer Res 1986;46:3924-3931.
- Chisari F, Klopchin K, Moriyama T, Pasquinielli C, Dunsford HA, Sell S, et al. Molecular pathogenesis of hepatocellular carcinoma in hepatitis B virus transgenic mice. Cell 1989;59:1145-1156.
- Wild CP, Garner RC, Montesano R, Tursi F. Aflatoxin B<sub>1</sub> binding to plasma albumin and liver DNA upon chronic administration to rats. Carcinogenesis 1986;7:853-858.
- Sabbioni G, Skipper PL, Buchi G, Tannenbaum SR. Isolation and characterization of the major serum albumin adduct formed by aflatoxin B<sub>1</sub> in vivo in rats. Carcinogenesis 1987;8:819-824.
- Breslow NE, Day NE. Statistical methods in cancer research. Vol. I. The analysis of case-control study. Lyon: International Agency for Research on Cancer. 1980:291.
- Puisieux A, Lim S, Groopman J, Ozturk M. Selective targeting of p53 gene mutational hotspots in human cancers by etiologically defined carcinogens. Cancer Res 1991;51:6185-6189.
- Hsu IC, Metcalf RA, Sun T, Welsh JA, Wang NJ, Harris CC. Mutational hotspot in p53 gene in human hepatocellular carcinomas. Nature 1991;350:427-428.
- Bresnac B, Kew M, Wands J, Ozturk M. Selective G to T mutations of p53 gene in hepatocellular carcinoma from South Africa. Nature 1991;350:429-431.
